# Supplementary material
Source: Elsevier journal article supplement (https://www.sciencedirect.com/science/article/pii/S0122726221000276)
Supplement: mmc1 [file S0122726221000276:mmc1.docx]

**ANEXOS**

**Anexo 1.** Clasificación KDIGO del daño renal agudo

|  | Cr sérica / ClCr | | | Diuresis |
| --- | --- | --- | --- | --- |
| Estadio | RIFLE (2004) | AKIN (2007) | KDIGO (2012) | pRIFLE/AKIN/KDIGO |
| 1 (R) | Cr basal × 1,5 o Disminución ClCr >25% | Cr basal × 1,5-2 o Aumento >0,3 mg/dl (26,5 umol/l) | Cr basal × 1,5-1,9 o Aumento >0,3 mg/dl (26,5 umol/l) en 48 h | <0,5 ml/kg/h × 6-12 h |
| 2 (I) | Cr basal × 2 o Disminución ClCr >50% | Cr basal × 2-3 | Cr basal × 2-2,9 | <0,5 ml/kg/h × 12 h |
| 3 (F) | Cr basal × 3 o Crs >4 mg/dl (354 umol/l) Aumento agudo >0,5 mg/ dl (44 umol/l) o Disminución ClCr >75% – ClCr <35 ml/min/1,73 m2 | Cr basal >× 3 (>300%) o Crs >4 mg/dl (354 umol/l) Aumento agudo >0,5 mg/ dl (44 umol/) o terapia renal sustitutiva | Cr basal > × 3 o Crs >4 mg/dl (354 umol/l) o Terapia renal sustitutiva – En menores de 18 años: FGe <35 ml/min/1,73 m2 | <0,3 ml/kg/h × 24 h o anuria 12 h |

Tomado de <https://www.aeped.es/sites/default/files/documentos/22_dano_renal_agudo.pdf>. Integración de los criterios RIFLE, pRIFLE y AKIN en la guía KDIGO de DRA (ClCr: aclaramiento de creatinina; Cr: creatinina sérica; FGe: filtrado glomerular estimado; h: horas) (8).

**Anexo 2.** Cálculo del puntaje vasoactivo-inotrópico.

Tomado de Davidson J, Tong S, Hancock H, Hauck A, et al. Prospective validation of the vasoactive inotropic score and correlation to short term outcomes in neonates and infants after cardiothoracic surgery. *Intensive Care Med*. 2012; 38:1184-1190. Favia I, Vitale V, Ricci Z. The vasoactive –inotropic score and levosimendán: time for LVIS? *J Cardiothorac Vasc Anesth*. 2013; 27(2):e15-6.
